# Supplementary material for: Endothelial Semaphorin 7A Promotes Inflammation in Seawater Aspiration-Induced Acute Lung Injury
Source: MDPI journal article supplement (doi:10.3390/ijms151119650), 2014-10-28

## Supplementary Information

**Figure S1.** Primary rat pulmonary microvascular endothelial cell (RPMVEC) (A) and sub-cultured cells (B) were observed by an inverted microscope (magnification 10×); (C) RPMVEC were identified by the expression of CD31 (magnification 20×).

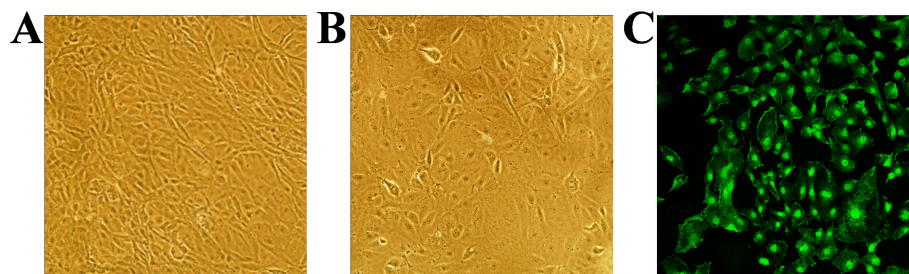

**Figure S2.** Specific siRNA against Semaphorin 7A (SEMA7A) or negative scrambled control (Scr siRNA).  $n = 8$ , \*\*\*  $p < 0.001$  versus 0  $\mu\text{g/mL}$  SEMA7A siRNA group.

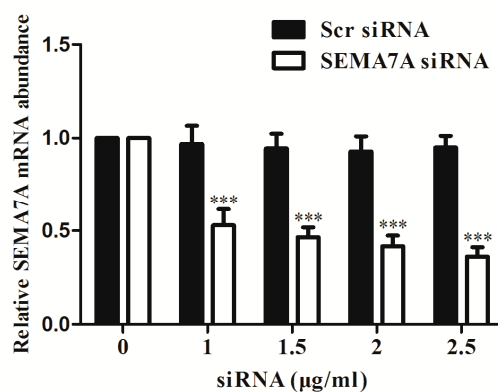

Supplement: s1 [file s1]
